# Supplementary material for: Green Chemistry Based Gold Nanoparticles Synthesis Using the Marine Bacterium Lysinibacillus odysseyi PBCW2 and Their Multitudinous Activities
Source: MDPI journal article supplement (doi:10.3390/nano12172940), 2022-08-26
Supplement: s1 [file s1]

# Green Chemistry Based Gold Nanoparticles Synthesis Using the Marine Bacterium *Lysinibacillus odysseyi* PBCW2 and Their Multitudinous Activities

Tijo Cherian \*, Debasis Maity, Ramasamy T. Rajendra Kumar, Govindasamy Balasubramani, Chinnasamy Ragavendran, Suneelkumar Yalla, Raju Mohanraju and Willie J. G. M. Peijnenburg \*

\* Correspondence: tvarghese891@gmail.com (T.C.); willie.peijnenburg@rivm.nl (W.J.G.M.P.)

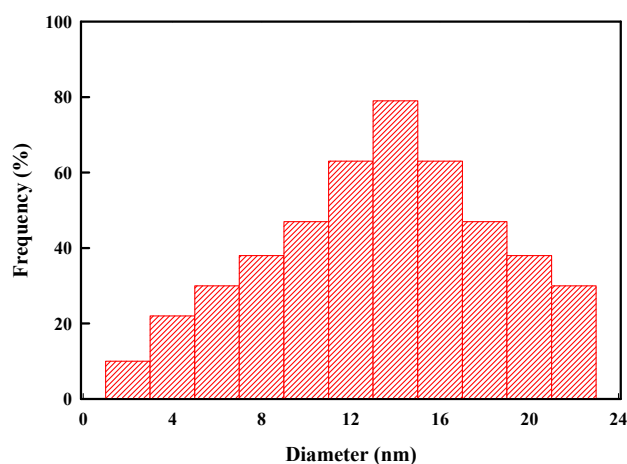

Figure S1. Particle histogram in respective TEM image.
